# Supplementary material for: TCERG1L allelic variation is associated with cisplatin-induced hearing loss in childhood cancer, a PanCareLIFE study
Source: PubMed Central journal article supplement (PMC8280110; doi:10.1038/s41698-021-00178-z), 2021-07-14
Supplement: 41698_2021_178_MOESM1_ESM.pdf [file 41698_2021_178_MOESM1_ESM.pdf]

Supplementary Table 1. Clinical characteristics of the PCL discovery cohort, Canadian first replication cohort and PCL second replication cohort.

|                                                 | PCL discovery cohort (D): N=390  |                            |        | Canadian replication cohort (R1): N=192 |                           |                    | PCL second replication cohort (R2): N=188* |                           |                    |
|-------------------------------------------------|----------------------------------|----------------------------|--------|-----------------------------------------|---------------------------|--------------------|--------------------------------------------|---------------------------|--------------------|
|                                                 | Muenster grade $\geq$ 2b (n=168) | Muenster grade <2b (n=222) | P      | Muenster grade $\geq$ 2b (n=115)        | Muenster grade <2b (n=77) | P                  | Muenster grade $\geq$ 2b (n=94)            | Muenster grade <2b (n=94) | P                  |
| Median age at diagnosis, years (range)          | 9.5 (0.0-18.8)                   | 12.8 (0.1-18.7)            | 0.001  | 3.0 (2.0-8.0)                           | 9.0 (2.0-13.0)            | 0.002              | 10.5 (0.8-17.6)                            | 13.10 (0.3-18.0)          | 0.07               |
| Calendar year of diagnosis, n (%)               |                                  |                            | 0.009  |                                         |                           | 0.51               |                                            |                           | NA                 |
| 1980-1994                                       | 16 (9.5)                         | 9 (4.1)                    |        | 16 (13.9)                               | 13 (16.9)                 |                    | 2 (2.1)                                    | 3 (3.2)                   |                    |
| 1995-2005                                       | 70 (41.7)                        | 74 (33.3)                  |        | 65 (56.5)                               | 37 (48.1)                 |                    | 43 (45.7)                                  | 25 (26.6)                 |                    |
| 2006-2016                                       | 82 (48.8)                        | 139 (62.6)                 |        | 34 (29.6)                               | 27 (35.1)                 |                    | 49 (52.1)                                  | 66 (70.2)                 |                    |
| Median time to follow-up, years (range)         | 0.4 (0.0-3.0)                    | 0.3 (0.0-2.5)              | 0.001  | 0.7 (0.2-11.4)                          | 0.8 (0.1-16.2)            | 0.91               | 1.6 (0.0-17.2)                             | 1.7 (0-11.8)              | 0.77               |
| Median age at follow-up, years (range)          | 9.9 (0.4-19.4)                   | 13.1 (0.3-19.7)            | 0.001  | 5.0 (0.5-16.5)                          | 10.9 (0.9-19.6)           | 0.001              | 14.9 (2.5-29.4)                            | 16.3 (1.5-26.7)           | 0.38               |
| Median TCD cisplatin, mg/m <sup>2</sup> (range) | 480 (83-808)                     | 453 (40-950)               | 0.005  | 400 (345-480)                           | 400 (300-480)             | 0.55               | 480 (83-730)                               | 480 (120-770)             | 0.90               |
| Male sex, n (%)                                 | 79 (47)                          | 102 (45.9)                 | 0.59   | 68 (59.1)                               | 40 (51.9)                 | 0.37               | 48 (51.1)                                  | 48 (51.1)                 | 1.00               |
| Tumor type, n (%)                               |                                  |                            | NA     |                                         |                           | NA                 |                                            |                           | NA                 |
| Carcinoma                                       | 2 (1.2)                          | 6 (2.7)                    |        | 0 (0)                                   | 3 (3.9)                   |                    | 0 (0)                                      | 0 (0)                     |                    |
| CNS tumor                                       | 3 (1.8)                          | 2 (0.9)                    |        | 6 (5.2)                                 | 3 (3.9)                   |                    | 5 (5.3)                                    | 4 (4.3)                   |                    |
| Germ cell tumor                                 | 12 (7.1)                         | 51 (23.0)                  |        | 8 (7.0)                                 | 19 (24.7)                 |                    | 2 (2.1)                                    | 16 (17.0)                 |                    |
| Hepatoblastoma                                  | 13 (7.7)                         | 20 (9.0)                   |        | 29 (25.2)                               | 10 (13.0)                 |                    | 5 (5.3)                                    | 5 (5.3)                   |                    |
| Hodgkin lymphoma                                | 1 (0.6)                          | 2 (0.9)                    |        | 0 (0)                                   | 0 (0)                     |                    | 0 (0)                                      | 0 (0)                     |                    |
| Neuroblastoma                                   | 44 (26.2)                        | 18 (8.1)                   |        | 42 (36.5)                               | 15 (19.5)                 |                    | 6 (6.4)                                    | 3 (3.2)                   |                    |
| Osteosarcoma                                    | 90 (53.6)                        | 118 (53.2)                 |        | 28 (24.3)                               | 21 (27.3)                 |                    | 58 (61.7)                                  | 53 (56.4)                 |                    |
| (Soft tissue) sarcoma                           | 2 (1.2)                          | 1 (0.5)                    |        | 0 (0)                                   | 2 (2.6)                   |                    | 0 (0)                                      | 0 (0)                     |                    |
| Other bone tumor                                | 0 (0.0)                          | 1 (0.5)                    |        | 0 (0)                                   | 0 (0)                     |                    | 0 (0)                                      | 0 (0)                     |                    |
| Other                                           | 1 (0.6)                          | 0 (0.0)                    |        | 2 (1.8)                                 | 4 (5.1)                   |                    | 14 (14.9)                                  | 0 (0)                     |                    |
| Missing                                         | 0 (0.0)                          | 3 (1.4)                    |        | 0 (0)                                   | 0 (0)                     |                    | 4 (4.3)                                    | 9 (9.6)                   |                    |
| Additional carboplatin, n (%)                   | 59 (35.1)                        | 17 (7.6)                   | <0.001 | 49 (42.6)                               | 12 (15.6)                 | $7 \times 10^{-5}$ | 38 (40.4)                                  | 15 (16.0)                 | $3 \times 10^{-4}$ |

\* This replication cohort represents the non-cranial irradiated cisplatin treated subset of survivors of childhood cancer included in PCL. The cases and controls were matched 1:1 based on gender, age at diagnosis and total cumulative dose cisplatin.

P-values represent statistical differences in clinical characteristics between patients with deleterious hearing loss, and patients without hearing loss.

Abbreviations: NA = not applicable as N is less than 5; PCL = PanCareLIFE; TCD = total cumulative dose.

Supplementary Table 2. The Muenster classification for ototoxicity grading.

| Grade | Muenster classification                                  |                              |
|-------|----------------------------------------------------------|------------------------------|
| 0     | ≤10 dB HL at all frequencies                             | Non-deleterious hearing loss |
| 1     | >10 and ≤20 dB HL in at least one frequency, or tinnitus |                              |
| 2a    | >20 – ≤40 dB HL at ≥4 kHz                                |                              |
| 2b    | >40 – ≤ 60 dB HL at ≥4 kHz                               | Deleterious hearing loss     |
| 2c    | >60 dB HL at ≥4 kHz                                      |                              |
| 3a    | >20 – ≤40 dB HL at <4 kHz                                |                              |
| 3b    | >40 – ≤60 dB HL at <4 kHz                                |                              |
| 3c    | >60 – <80 dB HL at <4 kHz                                |                              |
| 4     | ≥80 dB HL at <4 kHz                                      |                              |

Abbreviations: dB = decibel; HL = hearing loss; kHz = kilohertz.

Supplementary Table 3. Genetic analyses of the PCL discovery cohort, Canadian first replication cohort and PCL second replication cohort.

|                            | PCL discovery cohort<br>(n=390)  | Canadian first replication cohort<br>(n=192) | PCL second replication cohort<br>(n=188) |
|----------------------------|----------------------------------|----------------------------------------------|------------------------------------------|
| Cohort                     | Discovery cohort                 | First replication cohort                     | Second replication cohort                |
| DNA samples                | Blood or saliva                  | Blood or saliva                              | Blood or saliva                          |
| Genotyping                 | Infinium© Global Screening Array | Illumina© Infinium OmniExpress Array         | Taqman PCR                               |
| Quality control program    | PLINK v1.9                       | PLINK v1.9                                   | NA                                       |
| Variant call rate          | <97.5%                           | <95%                                         | NA                                       |
| Hardy-Weinberg equilibrium | $P < 1 \times 10^{-7}$           | $P < 1 \times 10^{-6}$                       | NA                                       |
| PCA analysis               | PLINK v1.9                       | EIGENSOFT v5                                 | NA                                       |
| Non-CEU samples removed    | No                               | No                                           | NA                                       |
| Imputation method          | Michigan Imputation Server       | SHAPEIT v2, IMPUTE2 v2.3.2                   | NA                                       |
| Reference panel            | Haplotype Reference Consortium   | Phase 3 1000 Genomes Project                 | NA                                       |

Abbreviations: CEU = European descent; NA: not applicable; PCA = principal component analysis; PCL = PanCareLIFE.

Supplementary Table 4. Genotype frequencies and association results for heterozygote and homozygote TCERG1L carriers in the discovery cohort and replication cohorts.

| Study (N)               | Genotype (N) | OR (95% CI)       | P-value |
|-------------------------|--------------|-------------------|---------|
| Discovery (390)         | TT (274)     | 1                 | REF     |
|                         | TC (108)     | 2.57 (1.63-4.06)  | <0.001  |
|                         | CC (8)       | 2.95 (0.69-12.59) | 0.15    |
| R1 (192)                | TT (159)     | 1                 | REF     |
|                         | TC (32)      | 1.91 (0.83-4.39)  | 0.13    |
|                         | CC (1)       | 2.25 (0.09-55.98) | 0.62    |
| R2 (188)                | TT (150)     | 1                 | REF     |
|                         | TC (36)      | 6.90 (2.71-17.58) | <0.001  |
|                         | CC (2)       | 1.38 (0.08-22.50) | 0.82    |
| Combined analysis (770) | TT (583)     | 1                 | REF     |
|                         | TC (176)     | 2.55 (1.79-3.62)  | <0.001  |
|                         | CC (11)      | 1.84 (0.53-6.34)  | 0.18    |

Abbreviations: OR=odds ratio; R1=replication cohort 1; R2=replication cohort 2.

Supplementary Table 5. Look up results of rs893507 in the CHARGE cohort hearing impairment.

| Phenotype | rsID     | Ref/Eff | EAF  | Beta  | SE   | P-value | N     |
|-----------|----------|---------|------|-------|------|---------|-------|
| HIGH      | rs893507 | T/C     | 0.15 | -0.03 | 0.02 | 0.2     | 9,675 |
| LOW       | rs893507 | T/C     | 0.15 | -0.02 | 0.02 | 0.4     | 9,675 |

The rs893507 variant we found in our discovery cohort did not show significant replication in the CHARGE cohort hearing impairment.

Abbreviations: EAF = effect allele frequency; Eff = effect allele; HIGH = High frequency hearing loss (4 and 8 kHz); LOW = Low and mid frequency hearing loss (0.5, 1 & 2 kHz); Ref = reference allele; SE = standard error.

Supplementary Table 6. Association between *TCERG1L* and deleterious hearing loss in the PCL second replication cohort, for childhood cancer survivors treated with and without cranial irradiation.

|                          | PCL second replication cohort                                 |                                                  |                          |
|--------------------------|---------------------------------------------------------------|--------------------------------------------------|--------------------------|
|                          | Analysis in matched* non-cranial irradiated survivors (N=188) | Analysis in cranial irradiated survivors (N=553) | Total (N=741)            |
| Muenster grade $\geq 2b$ | 94                                                            | 92                                               | 186                      |
| Muenster grade $< 2b$    | 94                                                            | 461                                              | 555                      |
| <i>TCERG1L</i> rs893507  | OR 5.45 (95% CI 2.3-12.8)                                     | OR 1.25 (95% CI 0.6-2.5)                         | OR 1.32 (95% CI 0.9-1.9) |

\*Survivors were matched for age, cumulative dose cisplatin and gender.

Supplementary Table 7. Risk factors associated with hearing loss in the discovery cohort, results of univariate and multivariate logistic regression analyses.

|                                                                  | Muenster $\geq 2b$<br>N=168 (43%) | Muenster $< 2b$<br>N=222 (57%) | UVA<br>OR (95% CI) | MVA<br>OR (95% CI) |
|------------------------------------------------------------------|-----------------------------------|--------------------------------|--------------------|--------------------|
| Age at diagnosis per 5 years increase, median (range)            | 9.5 (0.0-18.8)                    | 12.8 (0.1-19.3)                | 0.74 (0.56-0.92)*  | 0.76 (0.55-0.96)*  |
| Sex                                                              |                                   |                                |                    |                    |
| Female                                                           | 66 (46%)                          | 97 (49%)                       | REF                | REF                |
| Male                                                             | 79 (54%)                          | 102 (51%)                      | 0.88 (0.57-1.35)   | 0.78 (0.50-1.22)   |
| TCD cisplatin per 100 mg/m <sup>2</sup> increase, median (range) | 480 (83-808)                      | 453 (40-950)                   | 1.35 (1.15-1.55)*  | 1.35 (1.15-1.55)*  |

\* $P < 0.05$ ; Abbreviations: MVA=multivariate analysis; TCD=total cumulative dose; UVA=univariate analysis.

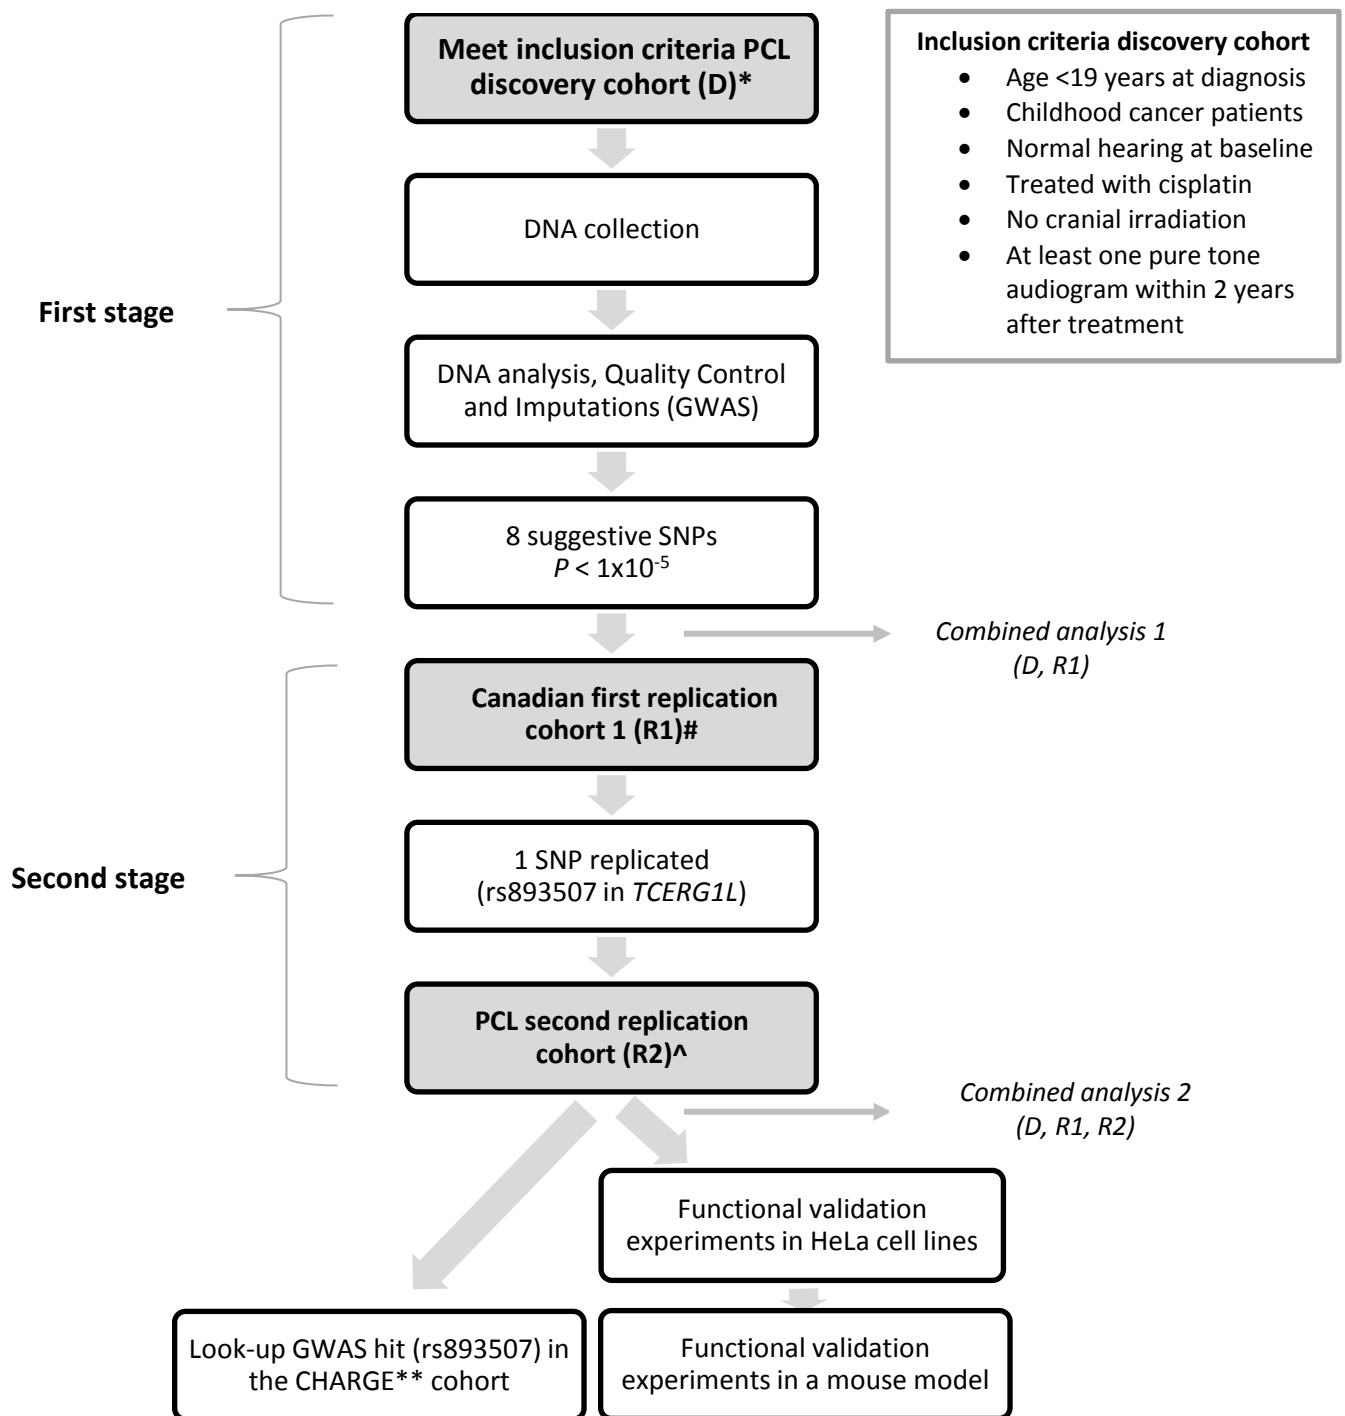

**Supplementary Figure 1.** Flowchart of the two-stage design of the discovery logistics, replication process, functional validation, and look-up of results in a healthy population.

\* The PCL discovery cohort (D) represent 390 cisplatin treated non-cranial irradiated childhood cancer patients (median age at diagnoses 11.1 years, 43.0% developed Muenster  $\geq 2b$  hearing loss). # The independent Canadian first replication cohort (R1) represent 192 non-cranial irradiated childhood cancer patients (median age at diagnosis 4.1 years, 59.9% developed Muenster  $\geq 2b$  hearing loss). ^ The independent PCL second replication cohort (R2) represent 188 childhood cancer survivors (median age at diagnosis 11.1 years, 50.0% developed Muenster  $\geq 2b$  hearing loss).

\*\* CHARGE age-related hearing impairment cohort (9,675 subjects of the general population, age >45 years at time of study).

**Abbreviations:** CHARGE = Cohorts for Heart and Aging Research in Genomic Epidemiology; DNA = deoxyribonucleic acid; GWAS = genome wide association study; PCL = PanCareLIFE; SNP = single nucleotide polymorphism; *TCERG1L* = Transcription Elongation Regulator 1-Like.



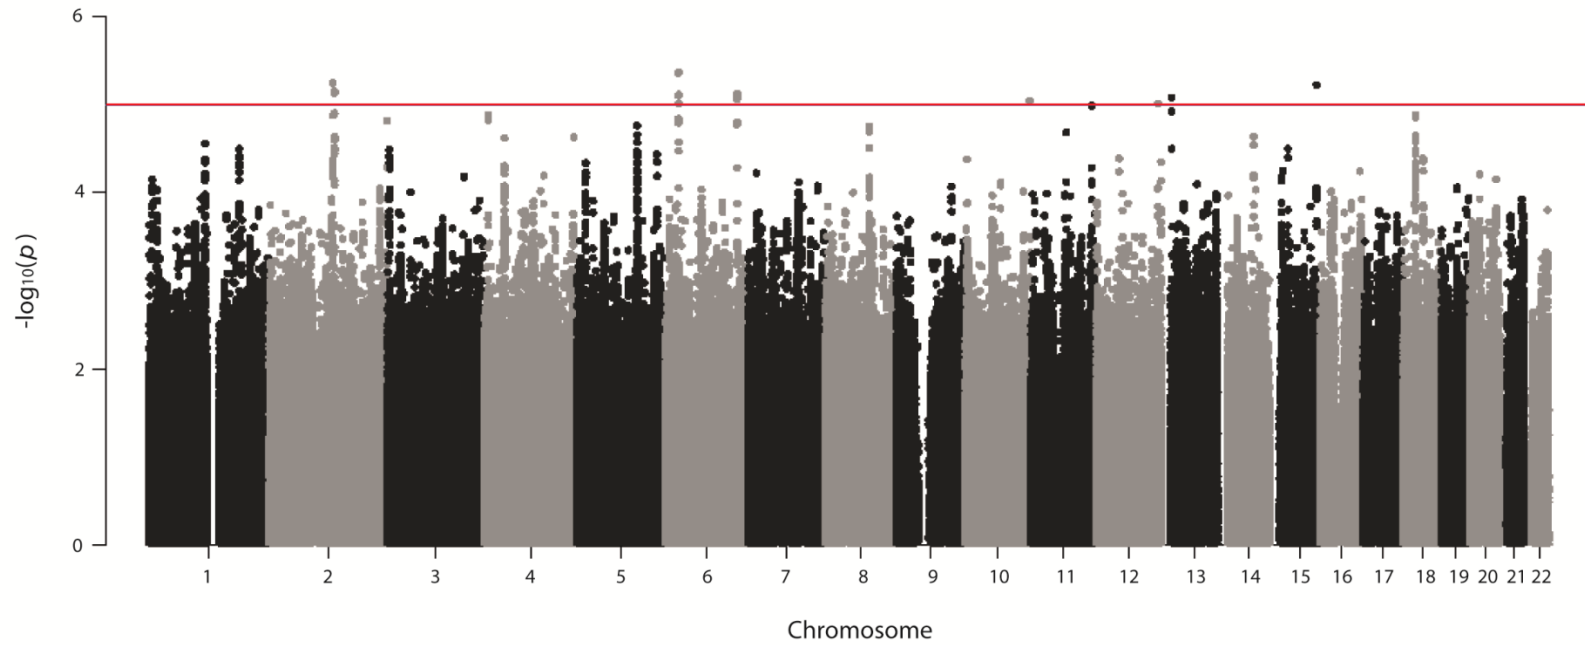

**Supplementary Figure 2.** Manhattan plot showing the top SNPs identified by GWAS in the PCL discovery cohort. The suggestive value for association ( $P=1.0 \times 10^{-5}$ ) is presented by the red line.

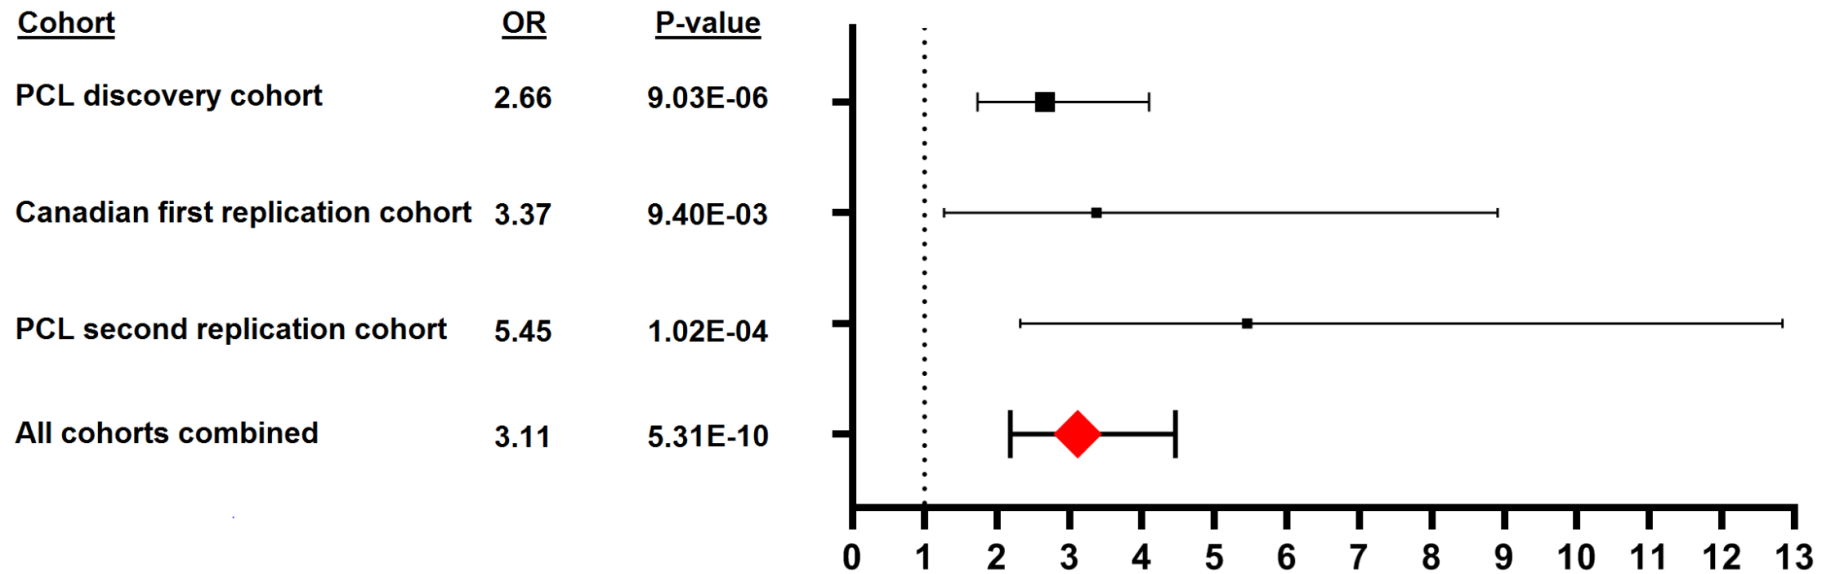

**Odds ratio with 95% confidence interval**  
 (<1 = decreased risk for hearing loss, >1 = increased risk for hearing loss)

**Supplementary Figure 3. Variation in TCERG1L (rs893507) association with cisplatin-induced hearing loss is genome-wide significant by combined analysis in three independent patient cohorts ( $I^2 = 8.1$ ).** The combined analysis showed that patients who carry the C allele increased the odds of cisplatin-induced hearing loss with 3.11 (95% CI 2.2-4.5) compared to patients who carry the T allele. The forest plot was created in GraphPad Prism version 8.3.0.

*Abbreviations:* OR = odds ratio; PCL = PanCareLIFE.

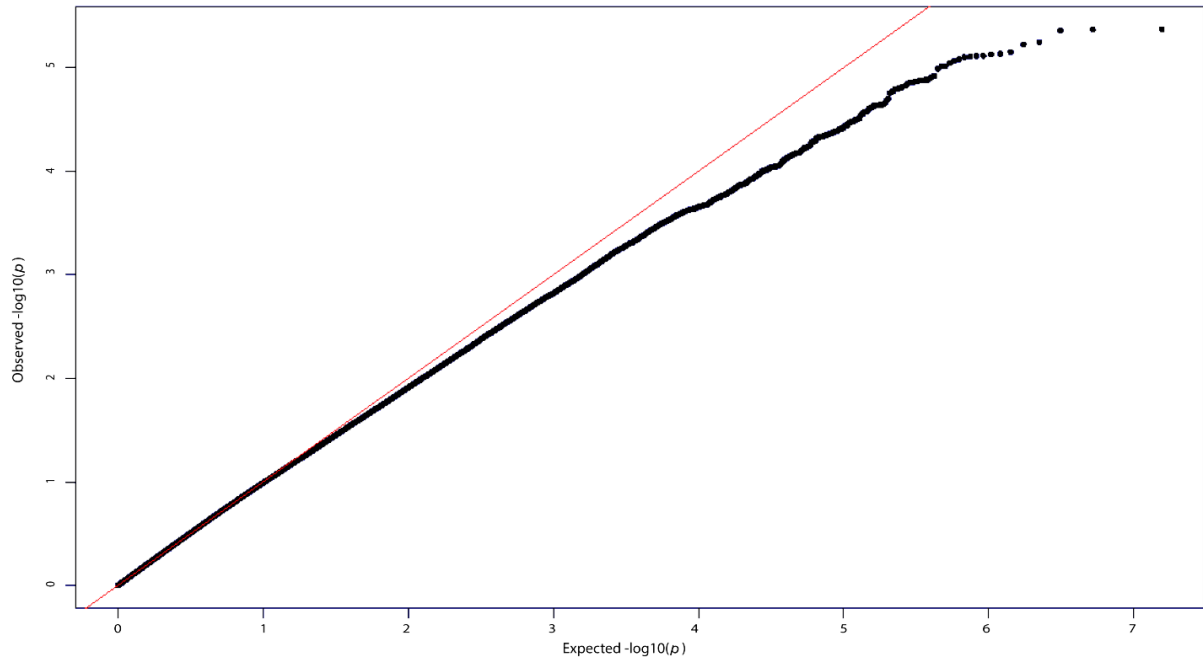

**Supplementary Figure 4.** Quantile-quantile (QQ) plot for genome-wide association with cisplatin-induced hearing loss ( $\lambda = 1.02$ ).
