# Supplementary material for: TCERG1L allelic variation is associated with cisplatin-induced hearing loss in childhood cancer, a PanCareLIFE study
Source: PubMed Central journal article supplement (PMC8280110; doi:10.1038/s41698-021-00178-z), 2021-07-14
Supplement: 41698_2021_178_MOESM2_ESM.pdf [file 41698_2021_178_MOESM2_ESM.pdf]

## Reporting Summary

Nature Research wishes to improve the reproducibility of the work that we publish. This form provides structure for consistency and transparency in reporting. For further information on Nature Research policies, see our [Editorial Policies](#) and the [Editorial Policy Checklist](#).

### Statistics

For all statistical analyses, confirm that the following items are present in the figure legend, table legend, main text, or Methods section.

n/a Confirmed

- |                                     |                                     |                                                                                                                                                                                                                                                            |
|-------------------------------------|-------------------------------------|------------------------------------------------------------------------------------------------------------------------------------------------------------------------------------------------------------------------------------------------------------|
| <input type="checkbox"/>            | <input checked="" type="checkbox"/> | The exact sample size ( $n$ ) for each experimental group/condition, given as a discrete number and unit of measurement                                                                                                                                    |
| <input type="checkbox"/>            | <input checked="" type="checkbox"/> | A statement on whether measurements were taken from distinct samples or whether the same sample was measured repeatedly                                                                                                                                    |
| <input type="checkbox"/>            | <input checked="" type="checkbox"/> | The statistical test(s) used AND whether they are one- or two-sided<br><i>Only common tests should be described solely by name; describe more complex techniques in the Methods section.</i>                                                               |
| <input type="checkbox"/>            | <input checked="" type="checkbox"/> | A description of all covariates tested                                                                                                                                                                                                                     |
| <input type="checkbox"/>            | <input checked="" type="checkbox"/> | A description of any assumptions or corrections, such as tests of normality and adjustment for multiple comparisons                                                                                                                                        |
| <input type="checkbox"/>            | <input checked="" type="checkbox"/> | A full description of the statistical parameters including central tendency (e.g. means) or other basic estimates (e.g. regression coefficient) AND variation (e.g. standard deviation) or associated estimates of uncertainty (e.g. confidence intervals) |
| <input type="checkbox"/>            | <input checked="" type="checkbox"/> | For null hypothesis testing, the test statistic (e.g. $F$ , $t$ , $r$ ) with confidence intervals, effect sizes, degrees of freedom and $P$ value noted<br><i>Give <math>P</math> values as exact values whenever suitable.</i>                            |
| <input checked="" type="checkbox"/> | <input type="checkbox"/>            | For Bayesian analysis, information on the choice of priors and Markov chain Monte Carlo settings                                                                                                                                                           |
| <input checked="" type="checkbox"/> | <input type="checkbox"/>            | For hierarchical and complex designs, identification of the appropriate level for tests and full reporting of outcomes                                                                                                                                     |
| <input type="checkbox"/>            | <input checked="" type="checkbox"/> | Estimates of effect sizes (e.g. Cohen's $d$ , Pearson's $r$ ), indicating how they were calculated                                                                                                                                                         |

*Our web collection on [statistics for biologists](#) contains articles on many of the points above.*

### Software and code

Policy information about [availability of computer code](#)

Data collection

Data analysis

For manuscripts utilizing custom algorithms or software that are central to the research but not yet described in published literature, software must be made available to editors and reviewers. We strongly encourage code deposition in a community repository (e.g. GitHub). See the Nature Research [guidelines for submitting code & software](#) for further information.

### Data

Policy information about [availability of data](#)

All manuscripts must include a [data availability statement](#). This statement should provide the following information, where applicable:

- Accession codes, unique identifiers, or web links for publicly available datasets
- A list of figures that have associated raw data
- A description of any restrictions on data availability

Because of restrictions based on privacy regulations and informed consent of the participants in Europe and Canada, data cannot be made freely available in a public repository. Data requests can be directed towards the PIs of the three included cohorts (MvdHE, BC, OZ). The GWAS summary statistics of the discovery cohort will be uploaded in GWAS Catalog directly after publication. The PanCareLIFE study was approved by the local ethics committees: Kantonale Ethikkommission

Bern, 362/2015; Comitato Etico Regionale, 507REG2014; Ethical Committee University Hospital Brno, June 11, 2016; Ethics Committee Fakultni Nemocnice v Motole Prague, EK-1447/14; De Videnskabsetiske Komiteer Region Hovedstaden, H-1-2014-125; Ethikkommission Medizinische Universität Graz, 27-015 ex 14/15; Ethikkommission der Universität Ulm, 160/17; Ethikkommission der Universität zu Lübeck, 14/181; Ethik-Kommission der Ärztekammer Westfalen-Lippe und der Westfälischen Wilhelms-Universität Münster, 2014-619; Medische Ethische Toetsings Commissie Erasmus MC, MEC-2014-633; Medisch Ethische Toetsingscommissie, 2015\_202. CPNDS studies were approved by the Canadian Research Ethics Board (i H04-70358). All participants provided written informed consent to participate in the study and to have their information obtained from treating physicians. RNA expression data files are publicly available at the NCBI gene expression omnibus (GEO) under accession number GSE117167.

## Field-specific reporting

Please select the one below that is the best fit for your research. If you are not sure, read the appropriate sections before making your selection.

Life sciences  Behavioural & social sciences  Ecological, evolutionary & environmental sciences

For a reference copy of the document with all sections, see [nature.com/documents/nr-reporting-summary-flat.pdf](https://www.nature.com/documents/nr-reporting-summary-flat.pdf)

## Life sciences study design

All studies must disclose on these points even when the disclosure is negative.

|                 |                                                                                                                                                                                                                                                                                                                                                                                                                                                                                                                                           |
|-----------------|-------------------------------------------------------------------------------------------------------------------------------------------------------------------------------------------------------------------------------------------------------------------------------------------------------------------------------------------------------------------------------------------------------------------------------------------------------------------------------------------------------------------------------------------|
| Sample size     | To estimate the number of cases required for the GWAS analyses, a sample size calculation was performed. Assuming a risk allele frequency of 0.2, a case to control ratio of 1:1, and a P value threshold of $P < 5 \times 10^{-8}$ for the GWAS analysis, a cohort of 574 patients was considered sufficient to detect an odds ratio of at least 2.8 with a statistical power of 80% in the design of the study.                                                                                                                         |
| Data exclusions | Exclusion criteria for this study were patients: (1) diagnosed with cancer at >19 years of age; (2) not initially treated with cisplatin, or initially treated with carboplatin; (3) had received cranial or inner ear radiation; (4) had not completed their chemotherapy treatment; (5) did not have at least one pure tone audiometric evaluation available after completion of chemotherapy; (6) did not have their biomaterial (blood or saliva) available for DNA extraction; and 7) had hearing loss before start of chemotherapy. |
| Replication     | The first replication cohort consisted of childhood cancer patients (n=192) treated with cisplatin from the Canadian Pharmacogenomics Network for Drug Safety (CPNDS). A second replication cohort consisted of a subset of childhood cancer survivors from the PCL WPS cohort (n=188).                                                                                                                                                                                                                                                   |
| Randomization   | The design did not include randomization. To control for covariates, we used logistic regression models including age at diagnosis, sex, total cumulative cisplatin dose and four principal components using rvtests.                                                                                                                                                                                                                                                                                                                     |
| Blinding        | The data were stripped of all identifiers and assigned a unique PCL-ID number, rendering the data pseudonymous for the investigators of this study. Data providers sent the pseudonymized original audiograms to the audiometry center (Department of Phoniarty and Pediatric Audiology, University Hospital Muenster, Germany) for standardized review. The audiogram assessors were blinded to patient characteristics including their treatment, such as platinum compound, platinum dose, or cranial irradiation.                     |

## Reporting for specific materials, systems and methods

We require information from authors about some types of materials, experimental systems and methods used in many studies. Here, indicate whether each material, system or method listed is relevant to your study. If you are not sure if a list item applies to your research, read the appropriate section before selecting a response.

### Materials & experimental systems

| n/a                                 | Involved in the study                                           |
|-------------------------------------|-----------------------------------------------------------------|
| <input checked="" type="checkbox"/> | <input type="checkbox"/> Antibodies                             |
| <input type="checkbox"/>            | <input checked="" type="checkbox"/> Eukaryotic cell lines       |
| <input checked="" type="checkbox"/> | <input type="checkbox"/> Palaeontology and archaeology          |
| <input checked="" type="checkbox"/> | <input type="checkbox"/> Animals and other organisms            |
| <input type="checkbox"/>            | <input checked="" type="checkbox"/> Human research participants |
| <input checked="" type="checkbox"/> | <input type="checkbox"/> Clinical data                          |
| <input checked="" type="checkbox"/> | <input type="checkbox"/> Dual use research of concern           |

### Methods

| n/a                                 | Involved in the study                           |
|-------------------------------------|-------------------------------------------------|
| <input checked="" type="checkbox"/> | <input type="checkbox"/> ChIP-seq               |
| <input checked="" type="checkbox"/> | <input type="checkbox"/> Flow cytometry         |
| <input checked="" type="checkbox"/> | <input type="checkbox"/> MRI-based neuroimaging |

## Eukaryotic cell lines

Policy information about [cell lines](#)

|                          |                                                                            |
|--------------------------|----------------------------------------------------------------------------|
| Cell line source(s)      | HeLa cells were obtained from the American Type Culture Collection (ATCC). |
| Authentication           | The cell line was not authenticated.                                       |
| Mycoplasma contamination | PCR testing for mycoplasma contamination was negative.                     |

Commonly misidentified lines  
(See [ICLAC](#) register)

HeLa cells were the only cell line used in this study.

## Human research participants

Policy information about [studies involving human research participants](#)

### Population characteristics

PCL discovery cohort (n=390): median age at diagnosis 11.1 years (0.0-18.8); median age at audiological testing 11.8 years (0.3-19.0); median total cumulative dose cisplatin 480 mg/m<sup>2</sup> (range: 40-950 mg/m<sup>2</sup>). Seventy-six (19.5%) patients had been treated with additional carboplatin. One hundred sixty-eight (43.1%) patients developed Muenster  $\geq 2b$  hearing loss. Canadian first replication cohort (n=192): median age at diagnosis 4.1 years (0.1-18.8); median cumulative dose cisplatin 400 mg/m<sup>2</sup> (300-480 mg/m<sup>2</sup>). One hundred fifteen patients (59.9%) developed Muenster  $\geq 2b$  hearing loss. PCL second replication cohort (n=188): median age at diagnosis 11.1 years (0.3-18.0); median cumulative dose of cisplatin 480 mg/m<sup>2</sup> (83-770); 94 survivors (50%) developed Muenster  $\geq 2b$  hearing loss.

### Recruitment

PCL discovery cohort and PCL second replication cohort: Study participants were recruited through the PCL network consisting of 14 institutions from 7 countries: Switzerland, Italy, Czech Republic, Denmark, Germany, Austria, and the Netherlands.  
Canadian children replication cohort: participants were recruited via the Canadian Pharmacogenomics Network for Drug Safety (CPNDS), a national research and patients care network established to reduce serious adverse drug reactions in children.  
Data for this study was collected prospectively as well as retrospectively. Selection bias could have occurred in the retrospective collection of data. As a result of missing or unclassifiable audiograms, some patients could not be included due to a missing phenotype. Because many of the patients with missing audiograms might have had good hearing function, they might therefore no longer had follow-up(s) for audiometric testing, As a consequence, the odds of ototoxicity based on the results of this study could have been slightly overestimated.

### Ethics oversight

The PanCareLIFE study was approved by the local ethics committees: Kantonale Ethikkommission Bern, 362/2015; Comitato Etico Regionale, 507REG2014; Ethical Committee University Hospital Brno, June 11, 2016; Ethics Committee Fakultni Nemocnice v Motole Prague, EK-1447/14; De Videnskabsetiske Komiteer Region Hovedstaden, H-1-2014-125; Ethikkommission Medizinische Universität Graz, 27-015 ex 14/15; Ethikkommission der Universität Ulm, 160/17; Ethikkommission der Universität zu Lübeck, 14/181; Ethik-Kommission der Ärztekammer Westfalen-Lippe und der Westfälischen Wilhelms-Universität Münster, 2014-619; Medische Ethische Toetsings Commissie Erasmus MC, MEC-2014-633; Medisch Ethische Toetsingscommissie, 2015\_202. CPNDS studies were approved by the Canadian Research Ethics Board (i H04-70358). All participants provided written informed consent to participate in the study and to have their information obtained from treating physicians.

Note that full information on the approval of the study protocol must also be provided in the manuscript.
